# Supplementary material for: Regulation of c-SMAC formation and AKT-mTOR signaling by the TSG101-IFT20 axis in CD4+ T cells
Source: PubMed Central journal article supplement (PMC10202954; doi:10.1038/s41423-023-01008-x), 2023-04-07
Supplement: 41423_2023_1008_MOESM1_ESM.pdf [file 41423_2023_1008_MOESM1_ESM.pdf]

**Supplementary Table 1.** Lists for flow cytometric antibody

| <b>Name</b>                 | <b>Clone</b> | <b>Color</b> | <b>Company</b>  | <b>Catalog number</b> |
|-----------------------------|--------------|--------------|-----------------|-----------------------|
| CD3                         | 17A2         | FITC         | BioLegend       | 100204                |
| CD4                         | GK1.5        | FITC         | BioLegend       | 100406                |
| CD19                        | 1D3          | FITC         | BD              | 561740                |
| Ki-67                       | 16A8         | FITC         | BioLegend       | 652410                |
| NK1.1                       | PK136        | FITC         | BD              | 553164                |
| IgG2ak isotype              | eBR2a        | FITC         | Invitrogen      | 11-4321-82            |
| CD3                         | 145-2C11     | PE           | BioLegend       | 100308                |
| CD44                        | IM7          | PE           | BD              | 553134                |
| p-mTOR                      | MRRBY        | PE           | Invitrogen      | 12-9718-42            |
| p- RPS6KB1                  | Cupk43k      | PE           | Invitrogen      | 12-9007-42            |
| IgG1k isotype               | MOPC-21      | PE           | BD              | 555749                |
| IgG2ak isotype              | RTK2758      | PE           | BioLegend       | 400508                |
| CD44                        | IM7          | PerCP-Cy5.5  | BioLegend       | 103031                |
| Ly6G                        | 1A8          | PerCP-Cy5.5  | BD              | 560602                |
| NK1.1                       | PK136        | PerCP-Cy5.5  | BioLegend       | 108727                |
| CD4                         | GK1.5        | APC          | BioLegend       | 100412                |
| CD25                        | 7D4          | APC          | Miltenyi Biotec | 130-102-787           |
| CD62L                       | MEL-14       | APC          | BD              | 553152                |
| CD69                        | H1.2F3       | APC          | BioLegend       | 104514                |
| TCR $\gamma/\delta$         | GL3          | APC          | BioLegend       | 118116                |
| Ly6C                        | HK1.4        | APC          | BioLegend       | 128016                |
| p-AKT1                      | SDRNR        | APC          | Invitrogen      | 17-9715-42            |
| IgG1k isotype               | RTK2071      | APC          | BioLegend       | 400412                |
| IgG2ak isotype              | RTK2758      | APC          | BioLegend       | 400511                |
| CD11c                       | N418         | PECy7        | BioLegend       | 117318                |
| CD25                        | PC61         | PECy7        | BD              | 561780                |
| CD8                         | 53-6.7       | APCCy7       | BioLegend       | 100714                |
| I-A/I-E                     | M5/114.15.2  | APCCy7       | BioLegend       | 107627                |
| GLUT1                       | EPR3915      | AF647        | Abcam           | Ab195020              |
| CD3                         | 17A2         | AF700        | BioLegend       | 100215                |
| CD45.2                      | 104          | AF700        | BD              | 560693                |
| CD4                         | GK1.5        | BV421        | Invitrogen      | 48-0041-82            |
| SiglecF                     | E50-2440     | BV421        | BD              | 562681                |
| CD8                         | 53-6.7       | BV510        | BD              | 563068                |
| CD11b                       | M1/70        | BV510        | BD              | 562950                |
| CD44                        | IM7          | BV510        | BD              | 563114                |
| MitoTracker                 |              |              | Invitrogen      | M7512                 |
| 7-AAD                       |              |              | BioLegend       | 420404                |
| Fixable viability stain 450 |              |              | BD              | 562247                |
| PI                          |              |              | Invitrogen      | 00-6990-50            |

**Supplementary Table 2.** Lists for western blot and Co-IP antibody

| <b>Name</b>                              | <b>Clone</b> | <b>Company</b>     | <b>Catalog number</b> |
|------------------------------------------|--------------|--------------------|-----------------------|
| IFT20                                    | Polyclonal   | Proteintech        | 13615-1-AP            |
| TSG101                                   | 4A10         | Abcam              | Ab83                  |
| $\beta$ -actin                           | C4           | Santa Cruz Biotech | SC-47778              |
| GAPDH                                    | 14C10        | Cell signaling     | 2118S                 |
| StarBright Blue 700 Goat Anti-Rabbit IgG |              | Bio-Rad            | 12004161              |
| StarBright Blue 700 Goat Anti-Mouse IgG  |              | Bio-Rad            | 12004158              |

**Supplementary Table 3.**Lists for ELISA antibody

| <b>Name</b>                     | <b>Clone</b> | <b>Company</b> | <b>Catalog number</b> |
|---------------------------------|--------------|----------------|-----------------------|
| Rat anti-Mouse IL-5             | TRFK5        | BD             | 554581                |
| Biotin anti-Mouse IL-5          | TRFK4        | BD             | 554397                |
| Rat anti-Mouse IL-13            | eBioa13A     | Invitrogen     | 14-7133-81            |
| Biotin anti-Mouse IL-13         | eBio1316H    | Invitrogen     | 13-7135-85            |
| Rat anti-Mouse IL-17A           | TC11-18H10   | BD             | 555068                |
| Biotin anti-Mouse IL-17A        | TC11-8H4     | BD             | 555067                |
| Rat anti-Mouse IFN- $\gamma$    | R4-6A2       | BD             | 551216                |
| Biotin anti-Mouse IFN- $\gamma$ | R4-6A2       | BD             | 551506                |
| HRP Streptavidin                |              | BioLegend      | 405210                |

**Supplementary Table 4.**Lists for confocal and TEM antibody

| <b>Name</b>                                | <b>Clone</b> | <b>Company</b>            | <b>Catalog number</b> |
|--------------------------------------------|--------------|---------------------------|-----------------------|
| IFT20                                      | Polyclonal   | Proteintech               | 13615-1-AP            |
| TSG101                                     | 4A10         | Abcam                     | Ab83                  |
| MitoTracker RedCMXRos                      |              | Invitrogen                | M7512                 |
| CD3                                        |              | Invitrogen                | 16-0031-85            |
| CD28                                       | 145-2C11     | BioLegend                 | 102102                |
| AF488 Goat Anti-Mouse IgG (H+L)            | 37.51        | Jackson<br>ImmunoResearch | 115-545-166           |
| AF594 Goat Anti-Rabbit IgG (H+L)           | Polyclonal   | Jackson<br>ImmunoResearch | 111-585-144           |
| AF647 Goat Anti-Armenian Hamster IgG (H+L) | Polyclonal   | Jackson<br>ImmunoResearch | 127-605-160           |
| Goat-anti-Rabbit IgG (H&L)                 |              | Aurion                    | 810.011               |
| Mounting Medium with DAPI                  |              | Abcam                     | Ab104139              |

**Supplementary Table 5.** Lists for T cell differentiation antibody

| <b>Name</b>        | <b>Clone</b> | <b>Company</b> | <b>Catalog number</b> |
|--------------------|--------------|----------------|-----------------------|
| CD3                |              | Invitrogen     | 16-0031-85            |
| CD28               | 145-2C11     | BioLegend      | 102102                |
| Anti-IL-4          | 11B11        | BioXCell       | BE0045                |
| Anti-IFN- $\gamma$ | XMG1.2       | BioXCell       | BE0055                |
| IL-2               |              | Biolegend      | 589104                |
| IL-4               |              | Peprotech      | 214-14                |
| IL-6               |              | Peprotech      | 216-16                |
| IL-12              |              | Peprotech      | 210-12                |
| TGF- $\beta$ 1     |              | Biolegend      | 580702                |
